# Supplementary material for: The Effect of Probiotic Supplements on Metabolic Parameters of People with Type 2 Diabetes in Greece—A Randomized, Double-Blind, Placebo-Controlled Study
Source: MDPI journal article supplement (doi:10.3390/nu15214663), 2023-11-03
Supplement: s1 [file s1]

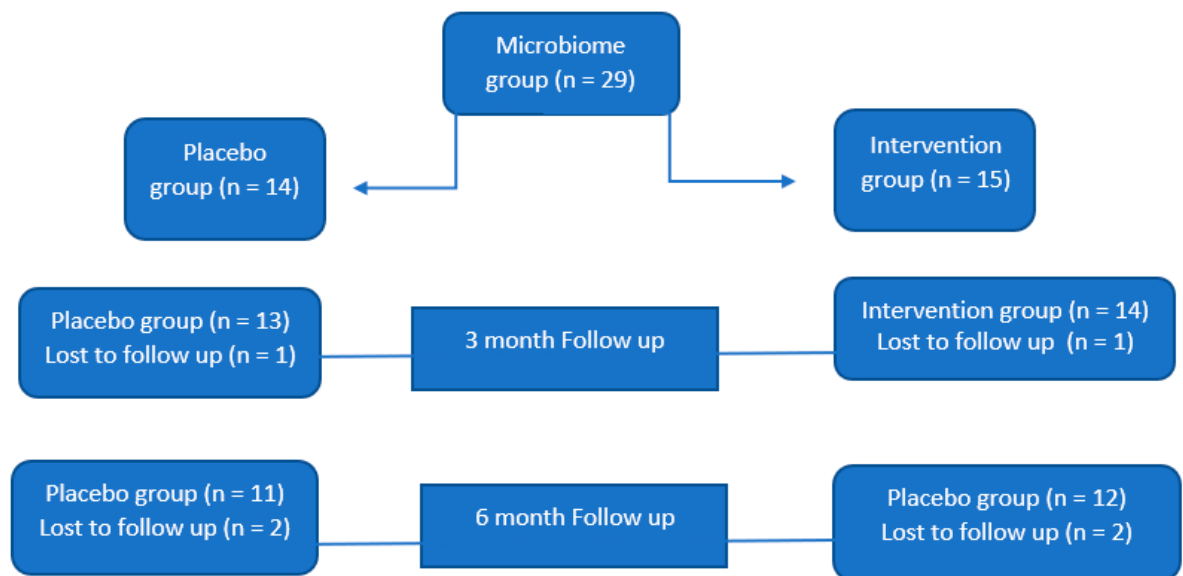

**Figure S1.** Flowchart detailing participants' recruitment, randomization, and allocation for the placebo and intervention in the microbiome sub-group.

**Table S1:** Baseline demographic, clinical, and laboratory characteristics of the intervention and control groups participating in the microbiome sub-study [mean (SD)].

|                          | <b>Total<br/>(n=23)</b> | <b>Intervention<br/>(n=12)</b> | <b>Control<br/>(n=11)</b> | <b><i>p</i>*</b> |
|--------------------------|-------------------------|--------------------------------|---------------------------|------------------|
| Males/ Females [n (%)]   | 13 (56.5) / 10 (43.5)   | 7 (58.3%) / 5 (41.7)           | 6 (54.5%) / 5 (45.5)      | NS               |
| Age (years)              | 64.09 (12.47)           | 60.58 (12.55)                  | 67.91 (11.75)             | NS               |
| Weight (kg)              | 96.34 (19.54)           | 90.46 (14.13)                  | 102.75 (23.11)            | NS               |
| BMI (kg/m <sup>2</sup> ) | 34.56 (7.64)            | 32.43 (5.9)                    | 36.89 (8.87)              | NS               |
| WC (cm)                  | 111.87 (12.65)          | 104.42 (9.86)                  | 120.00 (10.3)             | <b>0.001</b>     |
| SBP (mmHg)               | 129.43 (12.97)          | 124.83 (15.11)                 | 134.45 (8.13)             | NS               |
| DBP (mmHg)               | 78.74 (11.32)           | 80.42 (11.48)                  | 76.91 (11.39)             | NS               |
| FBG (mmol/L)             | 7.40 (0.91)             | 7.68 (1.14)                    | 7.11 (0.44)               | NS               |
| HbA1c (%)                | 7.31 (0.50)             | 7.45 (0.58)                    | 7.16 (0.38)               | NS               |
| TC (mmol/L)              | 3.78 (0.67)             | 3.75 (0.80)                    | 3.81 (0.54)               | NS               |
| Trig (mmol/L)            | 1.48 (0.45)             | 1.55 (0.47)                    | 1.40 (0.43)               | NS               |
| HDL-C (mmol/L)           | 1.03 (0.23)             | 1.09 (0.24)                    | 0.96 (0.20)               | NS               |
| LDL-C (mmol/L)           | 2.07 (0.48)             | 2.13 (0.34)                    | 2.01 (0.60)               | NS               |
| Creatin (umol/L)         | 79.58 (30.06)           | 86.65 (37.14)                  | 60.13 (16.8)              | NS               |
| AST (U/L)                | 20.39 (0.56)            | 20.58 (5.73)                   | 20.18 (9.46)              | NS               |
| ALT (U/L)                | 20.65 (9.97)            | 20.83 (6.86)                   | 20.46 (12.92)             | NS               |
| γGT (U/L)                | 18.74 (7.68)            | 19.33 (6.73)                   | 18.09 (8.88)              | NS               |
| Alk Phos (U/L)           | 60.30 (14.84)           | 55.83 (16.85)                  | 65.18 (11.03)             | NS               |

\*Comparison between intervention and control groups; NS = not significant. BMI: body mass index; WC: waist circumference; SBP: systolic blood pressure; DBP: diastolic blood pressure; FBG: fasting blood glucose; HbA1c: glycated hemoglobin; TC: total cholesterol; Trig: triglycerides, HDL-C: high density lipoprotein cholesterol; LDL-C: low density lipoprotein cholesterol; Creatin: creatinine; AST: aspartate aminotransferase; ALT: alanine aminotransferase; γGT: γ-glutamyl-transferase; Alk Phos: alkaline phosphatase.

**Table S2.** Anthropometric measures before and after intervention with probiotics or placebo in the microbiome sub-study [mean (SD)].

|                           | <b>Probiotics (n=12)</b> |                  |                 | <b>Placebo (n=11)</b> |                |                 | <b>P*</b>    |
|---------------------------|--------------------------|------------------|-----------------|-----------------------|----------------|-----------------|--------------|
|                           | Baseline                 | 3 mos            | 6 mos           | Baseline              | 3 mos          | 6 mos           |              |
| <b>BMI</b>                | 32.43                    | 31.87            | 31.49           | 36.89                 | 37.10          | 37.57           | <b>0.017</b> |
| <b>(kg/m<sup>2</sup>)</b> | (5.9)                    | (5.51)           | (5.67)          | (8.87)                | (8.90)         | (8.90)          |              |
| Change at 3 mos           |                          | -0.56<br>(0.88)  |                 |                       | 0.21<br>(0.75) |                 |              |
| Change at 6 mos           |                          |                  | -0.94<br>(1.56) |                       |                | 0.68<br>(1.44)  |              |
| <b>WC (cm)</b>            | 104.42                   | 103.00           | 101.17          | 120.00                | 121.09         | 122.18          | <b>0.001</b> |
|                           | (9.86)                   | (9.29)           | (8.85)          | (10.30)               | (10.52)        | (10.63)         |              |
| Change at 3 mos           |                          | -1.42<br>(1.51)  |                 |                       | 1.09<br>(2.21) |                 |              |
| Change at 6 mos           |                          |                  | -3.25<br>(2.77) |                       |                | 2.18<br>(4.26)  |              |
| <b>SBP</b>                | 124.83                   | 123.33           | 127.33          | 134.45                | 134.45         | 135.36          | NS           |
| <b>(mmHg)</b>             | (15.11)                  | (9.24)           | (5.93)          | (8.13)                | (10.01)        | (14.75)         |              |
| Change at 3 mos           |                          | -1.50<br>(11.74) |                 |                       | 0.00<br>(7.21) |                 |              |
| Change at 6 mos           |                          |                  | 2.50<br>(17.78) |                       |                | 0.91<br>(13.25) |              |
| <b>DBP</b>                | 80.42                    | 80.00            | 78.55           | 76.91                 | 78.82          | 78.55           | NS           |
| <b>(mmHg)</b>             | (11.48)                  | (10.50)          | (15.12)         | (11.39)               | (12.68)        | (15.08)         |              |
| Change at 3 mos           |                          | -0.42<br>(2.57)  |                 |                       | 1.91<br>(3.86) |                 |              |
| Change at 6 mos           |                          |                  | 2.33<br>(5.91)  |                       |                | 1.64<br>(7.76)  |              |

\*P: comparison between groups by repeated measures ANOVA. BMI: body mass index; WC: waist circumference; SBP: systolic blood pressure; DBP: diastolic blood pressure

**Table S3.** Changes in glycemic and lipid parameters before and after the intervention with probiotics or placebo in the microbiome sub-study [mean (SD)].

|                 | Probiotics (n=46) |                 |                 | Placebo (n=45) |                 |                 | P            |
|-----------------|-------------------|-----------------|-----------------|----------------|-----------------|-----------------|--------------|
|                 | Baseline          | 3 mos           | 6 mos           | Baseline       | 3 mos           | 6 mos           |              |
| <b>HbA1c</b>    | 7.45              | 6.98            | 6.73            | 7.16           | 7.20            | 7.18            | <b>0.026</b> |
| <b>(%)</b>      | (0.58)            | (0.38)          | (0.47)          | (0.38)         | (0.44)          | (0.52)          |              |
| Change at 3 mos |                   | -0.48<br>(0.30) |                 |                | 0.04<br>(0.12)  |                 |              |
| Change at 6 mos |                   |                 | -0.73<br>(0.48) |                |                 | 0.02<br>(0.28)  |              |
| <b>FBG</b>      | 7.68              | 6.59            | 6.17            | 7.11           | 6.99            | 7.15            | <b>0.057</b> |
| <b>(mmol/L)</b> | (1.15)            | (0.66)          | (0.70)          | (0.44)         | (0.43)          | (0.67)          |              |
| Change at 3 mos |                   | -1.09<br>(0.83) |                 |                | -0.12<br>(0.31) |                 |              |
| Change at 6 mos |                   |                 | -1.51<br>(1.16) |                |                 | 0.04<br>(0.61)  |              |
| <b>TC</b>       | 3.75              | 3.63            | 3.54            | 3.82           | 3.79            | 3.97            | NS           |
| <b>(mmol/L)</b> | (0.80)            | (0.71)          | (0.65)          | (0.54)         | (0.47)          | (0.57)          |              |
| Change at 3 mos |                   | -0.12<br>(0.26) |                 |                | -0.02<br>(0.19) |                 |              |
| Change at 6 mos |                   |                 | -0.21<br>(0.35) |                |                 | 0.16<br>(0.34)  |              |
| <b>Trig</b>     | 1.55              | 1.49            | 1.47            | 1.40           | 1.48            | 1.60            | <b>0.030</b> |
| <b>(mmol/L)</b> | (0.47)            | (0.43)          | (0.46)          | (0.43)         | (0.47)          | (0.53)          |              |
| Change at 3 mos |                   | -0.06<br>(0.07) |                 |                | 0.08<br>(0.08)  |                 |              |
| Change at 6 mos |                   |                 | -0.07<br>(0.11) |                |                 | 0.20<br>(0.15)  |              |
| <b>HDL-C</b>    | 1.09              | 1.10            | 1.12            | 0.96           | 0.93            | 0.91            | NS           |
| <b>(mmol/L)</b> | (0.24)            | (0.26)          | (0.27)          | (0.20)         | (0.17)          | (0.16)          |              |
| Change at 3 mos |                   | 0.01<br>(0.04)  |                 |                | -0.03<br>(0.06) |                 |              |
| Change at 6 mos |                   |                 | 0.03<br>(0.07)  |                |                 | -0.05<br>(0.12) |              |
| <b>LDL-C</b>    | 2.13              | 2.05            | 2.10            | 2.01           | 1.97            | 2.02            | NS           |
| <b>(mmol/L)</b> | (0.34)            | (0.34)          | (0.40)          | (0.60)         | (0.52)          | (0.53)          |              |
| Change at 3 mos |                   | -0.09<br>(0.13) |                 |                | -0.04<br>(0.12) |                 |              |
| Change at 6 mos |                   |                 | -0.03<br>(0.26) |                |                 | 0.01<br>(0.10)  |              |

P: comparison between groups by the two-factor mixed repeated measures ANOVA, adjusted for change in WC at 6 months. HbA1c: glycated hemoglobin; FBG: fasting blood glucose; TC: total cholesterol; Trig: triglycerides, HDL-C: high density lipoprotein cholesterol; LDL-C: low density lipoprotein cholesterol
